# Supplementary material for: Synthesis and characterization of soluble pyridinium-containing copolyimides
Source: Royal Society of Chemistry journal article supplement (doi:10.1039/d4ra06443g), 2024-01-01
Supplement: d4ra06443g1.pdf [file d4ra06443g1.pdf]

## Supplementary Materials: Synthesis and Characterization of Soluble Pyridinium Containing Copolyimides

Anastasiia Hubina\*, Alina Madalina Darabut, Yevheniia Lobko, Jaromir Hnat, Jan Merna, Karel Bouzek

Dr. A. Hubina, Prof. J. Merna, Dr. J. Hnat, Prof. K. Bouzek

University of Chemistry and Technology (UCT) Prague, Prague 166 28, Czech Republic

[hubina@vscht.cz](mailto:hubina@vscht.cz)

Dr. Y. Lobko, A.M. Darabut

Charles University, Prague 180 00, Czech Republic

**Table S1.** Monomers ratio in synthesized coPIs calculated from  $^1\text{H}$  NMR spectra.

| Sample  | Theoretical    | NMR calculated |
|---------|----------------|----------------|
|         | ODPA:BIS P:DAP |                |
| DAP-0.5 | 1:0.5:0.5      | 1:0.53:0.47    |
| DAP-0.3 | 1:0.7:0.3      | 1:0.7:0.3      |
| DAP-0.2 | 1:0.8:0.2      | 1:0.78:0.22    |

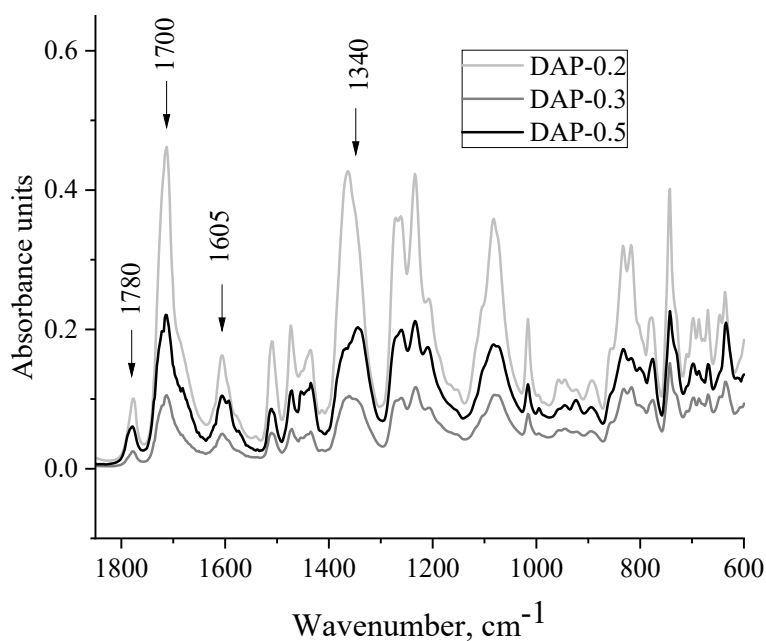

**Figure S1.** FTIR spectra of coPIs

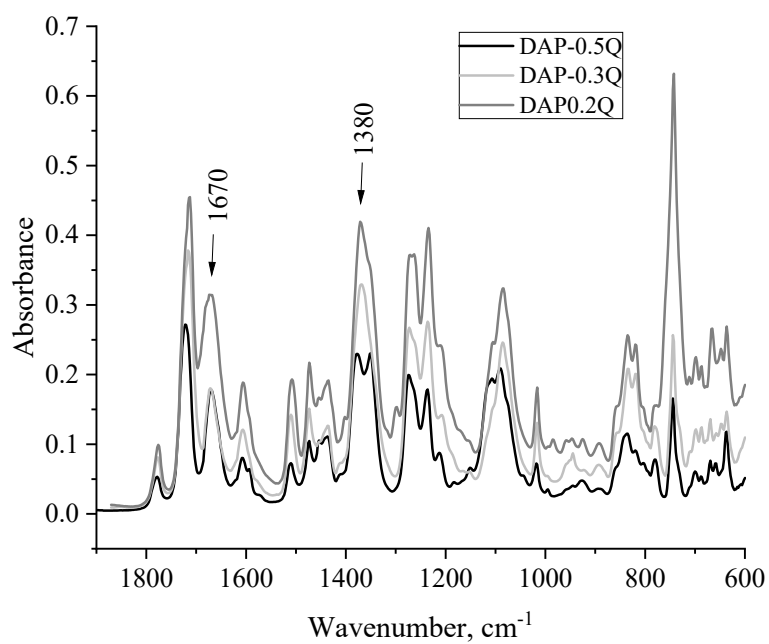

**Figure S2.** FTIR spectra of coPI-Qs

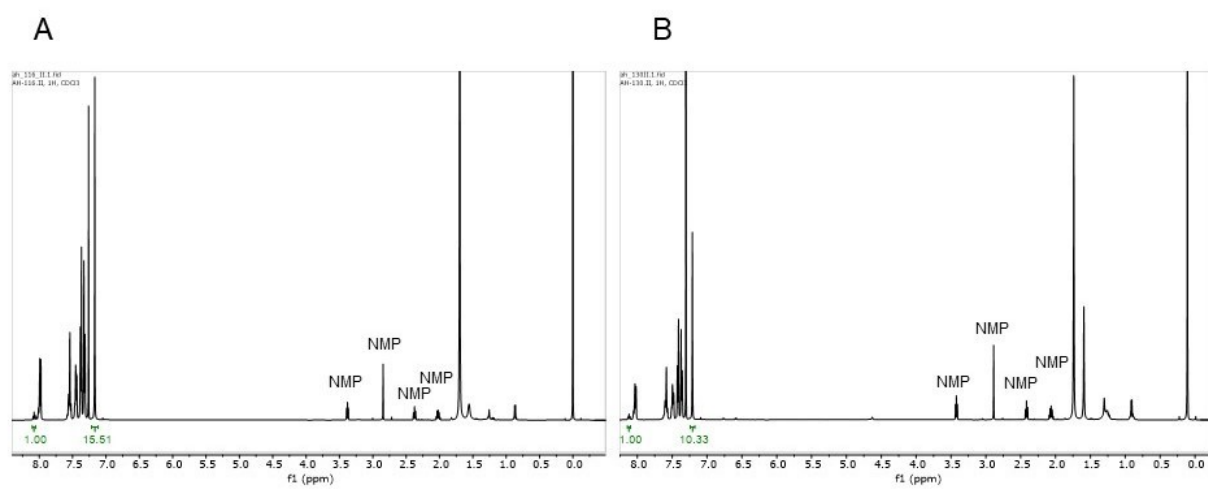

**Figure S3.** NMR spectra of coPIs: DAP-0.2 (A), DAP-0.3 (B)

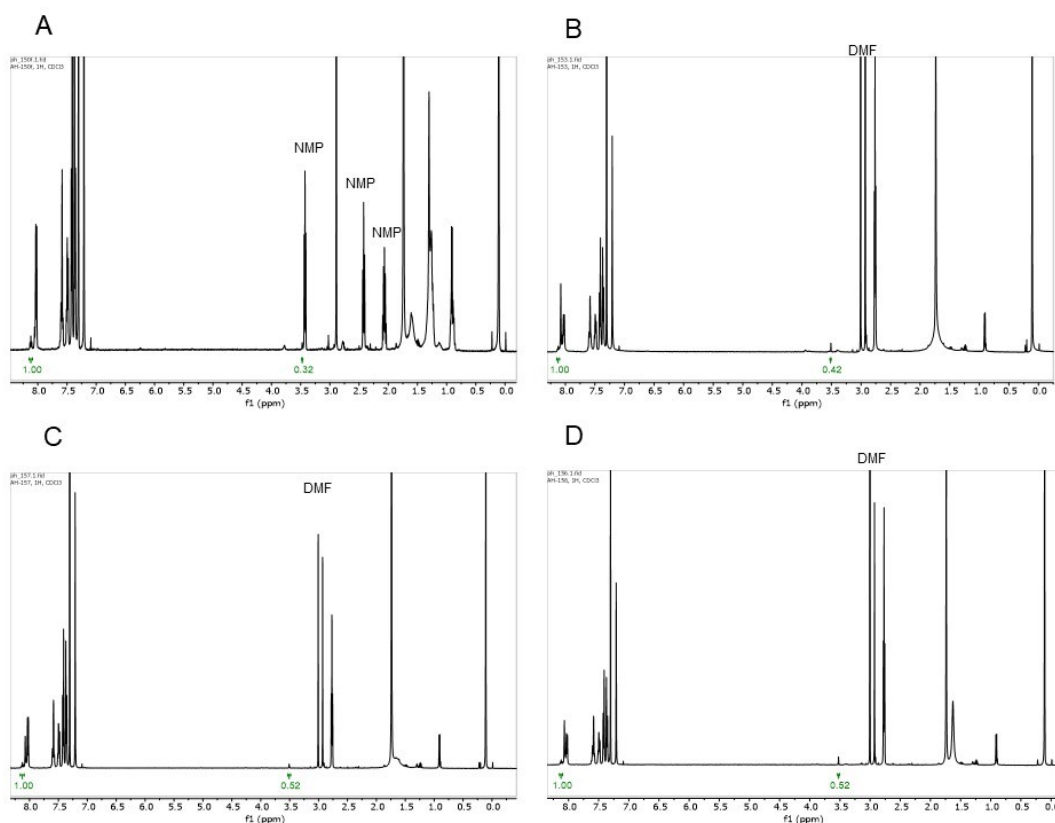

**Figure S4.** NMR spectra of coPI-Qs: DAP-0.2Q (A), DAP-0.3Q (B), DAP-0.2Q2-(C), DAP-0.3Q2 (D)

### SEC Measurements

Molar mass and its distribution was determined using Waters SEC-RI chromatograph (Waters 515 pump, Waters 2414 refractive index detector, ECOM 4 channel degasser). Separation of polymers (~2 mg/ml solution in chloroform) was done at 25°C on Phenogel 5  $\mu\text{m}$  linear column (7.8x300 mm) using chloroform (HPLC grade, stabilized by amylene) as mobile phase (1 ml/min). Evaluation of data was done in Clarity 6.0 GPC software using conventional calibration based on narrow polystyrene standards (580 – 1233000 g/mol) providing apparent molar mass values (polystyrene equivalents).

**Table S2.** Molar mass characteristics of PI and coPIs

| Sample  | $M_n$ , g/mol | $M_w$ , g/mol | D    |
|---------|---------------|---------------|------|
| DAP-0.5 | 22 100        | 522 000       | 23.6 |
| DAP-0.3 | 10 900        | 32 700        | 3.0  |
| DAP-0.2 | 45 100        | 93 400        | 2.1  |
| DAP-0   | 38 900        | 89 600        | 2.3  |
